1 **Interdependence of linkage disequilibrium, chromatin architecture and compositional**  
2 **genome organization of mammals**

3

4 **Running title: A common ground for meiotic and mitotic chromatin folding in**  
5 **mammals**

6

7 Kamel Jabbari\*, Johannes Wirtz, Martina Rauscher and Thomas Wiehe

8 Cologne Biocenter, Institute for Genetics, University of Cologne, Zùlpicher Straße 47a,  
9 50674 Köln, Germany.

10 \*Corresponding author: [kjabbari@uni-koeln.de](mailto:kjabbari@uni-koeln.de); Tel.: +49 221 470 1586

11

12

13

## ABSTRACT

14       Analysing chromatin architecture in interphase nuclei and recombination maps of human  
15 and mouse, we observed that blocks of elevated linkage disequilibrium tends to coincide with  
16 topologically associated domains (TADs) and isochores. There is a strong correlation between  
17 the GC level of TADs, double strand break (DSB) frequency and the local recombination rate.  
18 In particular, cold and hot spots of recombination tend to fall in AT- and GC-rich TADs,  
19 respectively. Also, binding of proteins which are critical for meiotic recombination hot spots  
20 (PRMD9, Spo11, DMC1 and H3K4me3) is positively correlated with the GC level of TADs.  
21 We conclude that the occurrence of meiotic DSB and recombination is associated with the  
22 same (com)positional features that constrain the architecture of chromosomes in the  
23 interphase nucleus of progenitor germ cells or pre-leptotene spermatocytes. This raises the  
24 possibility that regional variation of recombination is defined by compositional and epigenetic  
25 factors underlying chromatin architecture.

26

27       Key words: Recombination frequency, meiosis, chromatin loop, DNA sequence, epigenetic  
28       program.

29

## INTRODUCTION

30 A relationship between genome organization and recombination was discovered from  
31 banding of human chromosomes several decades ago. It was shown that translocations are not  
32 randomly located on chromosomes and that R bands and G/R borders were the sites of DNA  
33 exchanges and included the “hot spots” of mitotic chiasmata (Hecht 1988; Kuhn and Therman  
34 1986). These observations suggested an association with compositional discontinuities  
35 (change of GC % along chromosomes) (Bernardi 1989; Ikemura and Wada 1991; Holmquist,  
36 1992), which was later reported (Eyre-Walker 1993a) to be statistically significant. It was  
37 proposed that active chromosome domains could be more accessible to the base-mismatch  
38 repair system, investigated by Brown and Jiricny (1987, 1988), which preferentially changes  
39 mismatched A's and T's into G's and C's. Such mismatch repair, acting during recombination  
40 and recognized as gene conversion, would drive recombinogenic domains to GC richness.  
41 GC-biased repair of gene conversion (BGC) was suggested as the most likely explanation  
42 (Holmquist 1992; Eyre-Walker 1993b). With accumulating data from the human genome  
43 project, local rates of recombination were later shown to be positively correlated with regional  
44 GC levels in the human genome (Fullerton *et al.* 2001). Regions of weak and strong linkage  
45 disequilibrium (LD) were found to be remarkably consistent across human populations  
46 suggesting that GC%, DNA polymorphism and repeat content are strongly associated with the  
47 local extent of LD, where regions of strong LD are typically GC-poor (Smith *et al.* 2005).  
48 BGC is considered by some authors to be the inducer of the correlations between local GC %  
49 (isochores) and recombination rate (Duret and Galtier 2009; Weber *et al.* 2014). Other authors  
50 argue that local GC-richness may be the driving force for recombination (Marsolier-Kergoat  
51 *et al.* 2009). Whole genome sequencing of tetrad products from *Saccharomyces*, *Neurospora*,  
52 *chlamydomonas* and *Arabidopsis* did not show GC-bias, implying that a GC% vs.  
53 recombination correlation is unlikely to be explained by gene conversion (Liu *et al.* 2018).

54 It was shown (Blat *et al.* 2002) that meiotic chromosomal protein loading is modulated by  
55 isochores and that R-bands (GC-rich isochores dense regions) differentially favor double-  
56 strand break (DSB) formation during meiosis. In mice and humans, spermatocytes begin to  
57 enter leptotene, the first stage of meiotic prophase and later in this stage chromosomes are  
58 organized in alternating domains of greater and lower DSB activity (Lichten and de Massy  
59 2011; Grey *et al.* 2011; Grey *et al.* 2017). But features that influence DSB activity at the scale  
60 of chromosomal domains, such as chromatin loops (also called contact domains), are still  
61 poorly known. It is widely accepted that the binding of transcription factors and chromatin  
62 modifiers influences DSB density (Lichten 2008) and that DSBs occur in regions of  
63 accessible chromatin that are present in mitotic as well as in meiotic cells. Along with meiotic  
64 DSB repair, the search for homology and the catalysis of strand exchange are likely to be  
65 spatially and temporally coordinated to allow for the build-up of higher order chromosome  
66 structures (for example, synaptonemal complex, chromosome axes and chromatin loops); this  
67 is required for the recombination event to successfully join homologues (Zikler and Kleckner  
68 1999; Neal and Keeney 2006; Kleckner 2006). Cohesin has an architectural role in the  
69 organization of interphase chromosomes and similar roles have been proposed for cohesin and  
70 the related condensin complexes in meiotic and mitotic chromosomes (Tedeschi *et al.* 2013;  
71 Ono *et al.* 2003).

72 The entry of pre-leptotene spermatocytes (PLS) into meiosis is accompanied by several  
73 epigenetic changes, in primates as well as in mice. The location of most DSBs is correlated  
74 with the trimethylation of histone 3 lysine 4 (H3K4me3) by the DNA binding enzyme  
75 PRDM9 (Hayashi *et al.* 2005; Baudat *et al.* 2010; Brick *et al.* 2012). In mouse, 200 DSBs  
76 occur per meiosis, of which 15 to 35 will lead to crossovers (COs), and the remainder to non-  
77 crossovers (NCO) products (Handel and Schimenti 2010), indicating an excess of DSB  
78 events. These additional DSBs serve as facilitators of the process of homology searching and  
79 pairing but must be repaired as precisely as those designated to become crossovers (Gray and

80 Cohen 2016). The outcome is a heterogeneous recombination chromosomal profile where  
81 recombination is suppressed in specific mega-base sized regions (Smagulova et al., 2011).

82 To gain a comprehensive large scale view on the recombination chromatin landscape and  
83 dynamic, accumulated large numbers of CO events between the founder haplotypes over  
84 successive generations, and high density genotyping or genome-wide sequencing, can be used  
85 to obtain accurate localization of these events in human and mouse. The recombination map  
86 of accumulated CO events in mice (Margot et al. 2017) and LD-blocks from human  
87 population are put together to address questions regarding the link between recombination and  
88 chromatin architecture, in particular Topologically Associated Domains (TADs) (Dixon et al.  
89 2012).

90 Lately LD-blocks and TADs have also been investigated in two other studies which were  
91 deposited on bioRxiv. The first study (Greber et al. 2018) did not find a significant correlation  
92 of TAD boundaries with classical LD blocks, but when applying a new measure, called  
93 "Linkage Probability", the authors could report a strong association. The second article  
94 (Whalen and Pollard 2018) denies the existence of such an association.

95

## 96 MATERIAL AND METHODS

### 97 **Recombination and LD-blocks data sets**

98 Multiparent populations such as the Diversity Outbred (DO) mouse stock represents a  
99 valuable resource of large numbers of crossover events accumulated in present day sibs from  
100 founder haplotypes. It thus allows for an exhaustive exploration of the recombination  
101 landscape. We used the data from Morgan et al. 2017, a high-density genotype data set from  
102 6886 DO (diversity Outbred) mice spanning 16 breeding generations, in which 2.2 million CO  
103 events were localized in intervals with a median size of 28 kb. The construction of linkage  
104 maps in pedigrees assumes that every CO is distinct, and can be attributed to one of two  
105 specific meioses (in the case of unknown phase). By excluding shared by descent COs, the

106 authors reduced the total dataset of 2.2 million COs to a set of distinct COs (n=749,560).  
107 Coordinates and haplotypes of distinct COs as well as cold spots location are obtained from  
108 Morgan *et al.* 2017.

109 Linkage disequilibrium blocks in human populations are based on the classical  $r^2$  metric  
110 used to estimate if a genetic variant is in LD with another genetic variant (Pritchard and  
111 Przeworski 2001; Hill and Robertson 1968). LD is defined as the nonrandom association of  
112 alleles (of a given gene for example) at distinct close by loci. For our purpose, we used LD-  
113 blocks identified with a recently published method (Berisa and Pickrell 2016) applied to  
114 sequencing data from European (CEU, TSI, GBR, FIN and IBS), African (YRI, LWK and  
115 ASW) and East Asian (CHB, JPT and CHS) populations in the 1000 Genomes Phase 1 dataset  
116 (Auton *et al.* 2015). Covariance matrix was separately computed in the European, East Asian,  
117 and African meta-populations. The mean block size of 10 000 SNPs is set and used by the  
118 algorithm to define the block boundaries. To define human LD-blocks from 1000 genomes  
119 dataset, two sets of SNPs are defined as ‘approximately independent’ if the pair wise  $r^2$   
120 between SNPs in different sets is close to zero. This led to 2605, 1467 and 1725 LD-blocks in  
121 African, East Asian and European, respectively. The human recombination map  
122 (HapmapII\_GRCh37\_RecombinationHotspots) was downloaded from the ftp site of the 1000  
123 genome project.

#### 124 **TAD data sets**

125 To study the correlation between chromatin structure and recombination frequency in  
126 mammalian cells, we used TAD coordinates from the genome-wide chromatin interaction  
127 frequencies (Hi-C experiments) performed on human and mouse embryonic stem cells  
128 (Dixon *et al.* 2012). We used the UCSC batch coordinate conversion (liftOver at  
129 <http://genome.ucsc.edu/cgi-bin/hgLiftOver>) to convert isochore coordinates reported by  
130 Costantini *et al.* 2006 from hg18 to hg19 and mouse genome assembly mm9 to mm10 for  
131 compatibility with recombination hot/cold spot coordinates. Mouse isochore maps were

132 visualized with "draw-chromosome-gc.pl" (Paces *et al.* 2004) and Hi-C maps using  
133 Juicebox (Durand *et al.* 2016). We also made use of the recently published (Jung *et al.*  
134 2017) Hi-C data from mouse sperm, GEO accession: GSE79230 and mouse embryonic  
135 stem cells (Bonev *et al.* 2017), GEO accession: GSE96107.

136

### 137 **ChIP-Seq and sequencing data**

138 Meiotic DSBs are induced by dimers of the conserved topoisomerase-like protein Spo11  
139 via a transesterase reaction that links a Spo11 molecule to each 5' end of the broken DNA and  
140 release of covalently bound Spo11 to short oligonucleotides (Spo11 oligos). Mapping Spo11  
141 oligos data of mouse spermatocytes are obtained from Lange *et al.* 2016, a total of 13.960  
142 DSB hotspots were defined as regions where the SPO11-oligo is mapping. Genomic  
143 coordinates of the strand-exchange protein DMC1-bound single strand DNA from  
144 spermatocytes, H3K4me3 and the DNA-binding site of the zinc finger, histone  
145 methyltransferase PRDM9 were obtained from Lange *et al.* 2016 and Grey *et al.* 2017.

146

### 147 **Statistical analysis**

148 We asked whether the TADs, isochores and LD-blocks overlap more than expected by  
149 chance. As a quantitative assessment, we performed an association analysis of genomic  
150 regions based on permutation tests using the R/Bioconductor package regioneR (Gel *et al.*  
151 2016). The outcomes of the permutation were subsequently evaluated with the p-values and  
152 z-scores of the test. When performing an association analysis, it is possible to detect  
153 associations that are not reflective of boundary proximity, although they may be statistically  
154 significant. With the "local z-score" function (Gel *et al.* 2016) one can test whether the  
155 association between TADs or isochores and LD-blocks is specifically due to the common  
156 boundary positions of the analyzed regions. The main function to perform a permutation test

157 with regioneR is “*permTest*”, which takes a region set (RS), a randomization function and an  
158 evaluation function as input and returns the object “*permTestResults*” with the computed  
159 p-value and z-score which is calculated iteratively with shifted positions in the RS input set.  
160 We calculate z-scores for shifts of 500 kb in 5' and the 3' direction from an original position,  
161 the focal site. Plotting average z-scores versus shifted positions, one can observe how the  
162 value of the z-score changes when moving away from the focal site: a sharp peak at the centre  
163 indicates that the association is highly dependent on the specific genomic coordinates while a  
164 flat profile indicates regional or diffuse association.

165

166

## RESULTS

167

### **Recombination rate and TADs GC % are strongly correlated**

168

169

170

171

172

173

174

175

176

177

178

179

180

181

It is known that recombination rates and GC% are positively correlated in the human genome (Fullerton *et al.* 2001), as had been suspected from early chromatin and molecular studies (see Introduction). Here, we revisit this relationship in the light of chromatin TAD organization and density of DSB sites. At the time of DSB formation, most DSBs occur in loop sequences (Blat *et al.* 2002). Hence, the DSB distribution could be affected by loop size (Grey *et al.* 2017; Wang *et al.* 2017) and composition.

To test for a potential relation between TADs and the recombination map, we used the Hi-C map constructed from round spermatids (Jung *et al.* 2017) and a map of recombination cold spots constructed from a DO mice cohort (Morgan *et al.* 2017). As expected (Jung *et al.* 2017), similar results are obtained with embryonic stem (ES) cells (Bonev *et al.* 2017) (Figure S1). As an illustrative example, Figure 1a shows the co-mapping of cold spot domains, isochores and chromatin domains from mouse chromosome 17. Recombination cold spots tend to fall into GC-poor chromosomal domains, which are also frequently found to be attached to the interphase lamina, the “Lamina Associated Domains” (LADs) (Meuleman *et*



182 *al.* 2013; Kind *et al.* 2015; Jabbari and Bernardi, 2017). This observation is not limited to  
183 mouse chromosome 17. A histogram of GC% of cold spots containing TADs from all  
184 chromosomes (Figure 1b) shows that the paucity of cold spot in GC-rich TADs is a general  
185 feature ( $p$ -value  $< 2.2e-16$ ).

Figure 1

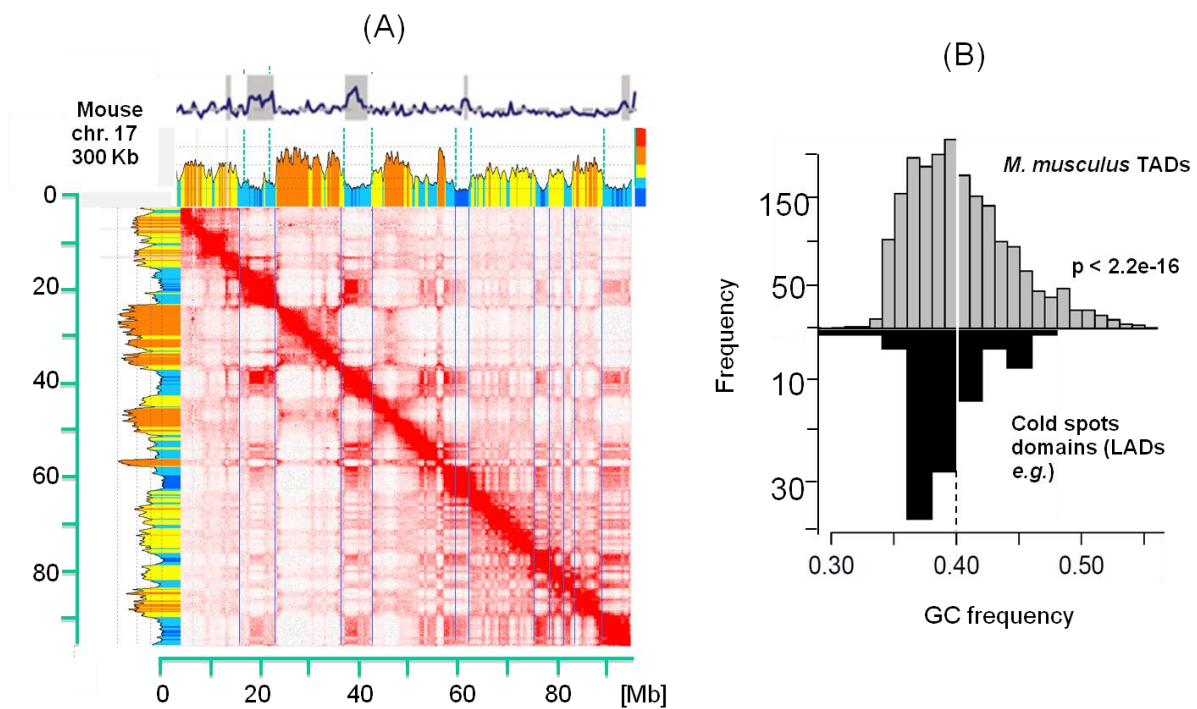

186

187 **Figure 1. Spatial correlation between recombination rate, TADs/LADs and isochores.**

188 (A) The heat map of chromatin interactions in mouse chromosome 17 (from Jung *et al.*  
189 2017) is aligned to the recombination profile from Morgan *et al.* and to the corresponding  
190 compositional profile drawn from mm10 genome assembly, using a sliding window of 300  
191 Kb. Increasing GC levels are represented in different colours, deep blue, light blue, yellow,  
192 orange and red, respectively; the multi-coloured vertical bars on the top right indicate GC  
193 levels that correspond to the compositional boundaries among isochores families. Blue line  
194 delimits GC-poor isochores and broken black lines indicate cold spots (in grey), very  
195 similar results are obtained with ES cells Hi-C interaction matrices ( Figure S1). (B) GC

196 histogram of embryonic stem cells TADs from Dixon *et al.* (top) and cold spots intervals  
197 (bottom) defined in Morgan *et al.* 2017.

198

199 In agreement with the results of figure 1a and 1b, we observe a significant positive correlation  
200 between recombination rate and TAD GC% in DO mouse (Figure 2a). The same trend is  
201 observed for human, where it is possible to draw a box-plot since isochore boundaries are  
202 well defined in this case (Costantini *et al.* 2006; Jabbari and Bernardi, 2017) (Figure 2b).

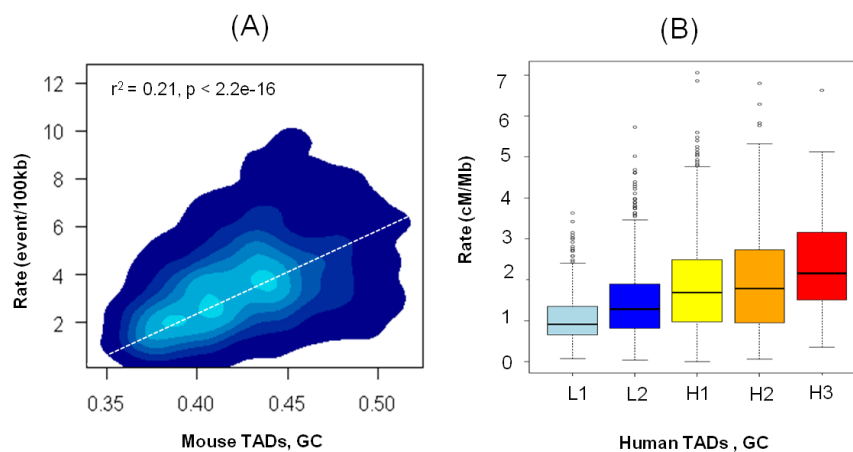

203

204 **Figure 2. Positive correlation between recombination rate and isochore or GC level of**  
205 **TADs.** (A) Contour plot representing the correlation between TADs GC level and  
206 recombination rate based on data from Morgan *et al.* 2017. (B) Box plot representing  
207 TADs GC level correlation with recombination of human using 1000 genome data. L1, L2,  
208 H1, H2 and H3 correspond isochore families (for more details see Jabbari and Bernardi  
209 2017).

210

211 Judging from the human and mouse analysis, we hypothesize that the correlation between  
212 recombination rate, local chromatin architecture and GC% is a general property of  
213 mammalian genomes. Binding events of key recombination proteins mapped around DSB

214 sites are also positively correlated with each other, with recombination rate and with TADs  
 215 GC % (Table 1).

216 **Table 1: Correlations between genomic features.** R is recombination event per 100 Kb;  
 217 blue and black respectively refer to RJ2 and B6 mouse strain data from Grey *et al.* 2017; red  
 218 refers to data from Lange *et al.* 2016 on B6 mouse strain. All *p*-values are  $< 2 \cdot 2e-16$  except  
 219 for spo11 vs. Prdm9 ( $r = 0.16, p = 3.31e-13$ ).

|         | TADs GC | R    | Spo11 | Prdm9     | H3K4me3   | DMC1      |
|---------|---------|------|-------|-----------|-----------|-----------|
| TADs GC |         | 0.46 | 0.38  | 0.25-0.32 | 0.35-0.43 | 0.26-0.20 |
| R       |         |      | 0.38  | 0.34-0.39 | 0.22-0.38 | 0.33      |
| Spo11   |         |      |       | 0.86      | 0.24-0.20 | 0.49-0.21 |
| Prdm9   |         |      |       |           | 0.40-0.55 | 0.21-0.14 |
| H3K4me3 |         |      |       |           |           | 0.61-0.41 |

220

221

## 222 Linkage disequilibrium blocks match TADs and LADs

223 The boundaries of recombination cold spots and TAD domains appear to overlap, as  
 224 visualized in the coarse-scale heat map shown in Figure 1a. To corroborate this visual  
 225 evidence quantitatively we tested for boundary overlap between blocks of linkage  
 226 disequilibrium (LD), TADs, and isochores using data from human 1000 genomes project. The  
 227 statistical tests for overlap between TADs or isochores and LD-blocks are all significant  
 228 (Figure S2). There is indeed a clear non-random association (all *p*-values are = 0.001)  
 229 between the two sets of genomic intervals (isochores or TADs and LD-blocks). Because  
 230 overlap does not mean boundary proximity, we analyzed the overlap of genomic ranges  
 231 taking into account boundary matches. To assess the strength of boundary sharing between  
 232 LD and TAD blocks, as a reference, we first determined the boundary sharing z-score profile  
 233 for LD blocks of European and African human populations (Figure 3).

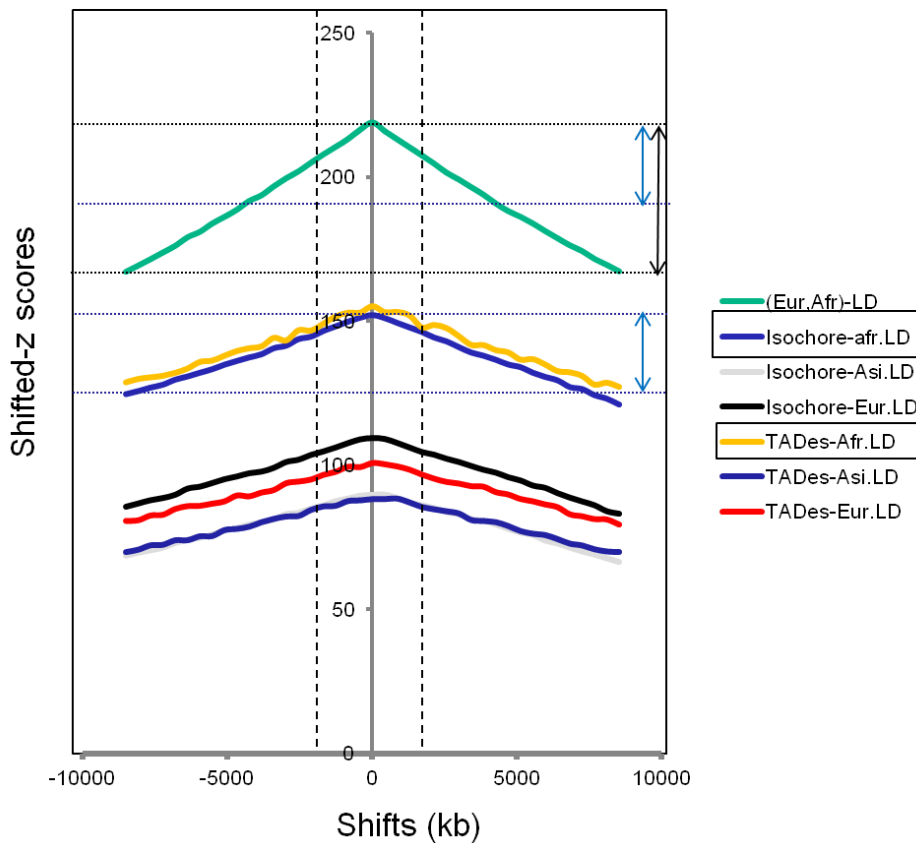

234

235 **Figure 3. TADs, Isochores and LD-blocks boundaries concordance.** Shifted z-score  
236 (on the y-axis) changes when moving the RS interval (x-axis): the peak at the centre  
237 indicates that the association is dependent on the genomic coordinates, while a flat profile  
238 will indicate that the association is regional. Abbreviations: asi. LD, afr. LD and eur. LD  
239 correspond to Asian, African and European linkage disequilibrium blocks, respectively.  
240 Black and blue arrows show the difference in drop of z-scores between afr.LD vs. eur.LD  
241 and isochores or TADs vs. afr.LD, pointing to a weaker drop of z-scores in the latter  
242 compared to the former.

243

244 As reflected in z-score profiles (Figure 3), the concordance between TADs or isochores and  
245 LD-blocks, although weaker in strength (~50% drop in z-score compared to the reference ,  
246 see arrows in figure 3), is evidenced by the peaked z-score profiles in all comparisons which  
247 suggests that the LD-blocks tend to overlap or match TADs and isochores.

248

249

## DISCUSSION

250

### Interphase-leptotene chromatin reorganization

251

252

253

254

255

256

257

258

259

260

261

262

263

264

265

266

267

268

269

270

271

272

Leptotene chromatin domains are seen as linear arrays of chromatin loops, connected by the synaptonemal axis, quite different from the interphase chromatin, where about 40% of the genome is made up of LADs. Can the pre-existing higher order chromatin structure in the interphase of PCG or PLS be related to those of early leptotene? As suggested by Figure 1a, the spatial correlation between recombination and loop structure of spermatids and ES cells appears to argue in favour of this link. This is consistent with the lower size of the loops attached to the SC in the telomeric and subtelomeric regions of mouse (Heng *et al.* 1996), known to be GC and gene-rich (Saccone *et al.* 1992), and with the observation that the yeast transcriptional landscape during meiosis dictates the preferred attachment sites of the SC axial elements (Sun *et al.* 2015). A parsimonious explanation could be that the chromatin loops of many leptotene chromosomes are, in part, inherited from the interphase of PGC or PLS through DNA composition constraints and active (*e.g.* H3K4me3, H3K9ac and H3K4me2) and/or repressive (*e.g.* H3K9me3, H3K27me3, H3K9me2) chromatin marks (Tang *et al.* 2016, for a review). The latter could maintain these regions in a “poised” folding state and may happen with the contribution of protein complexes still attached to the LADs DNA released from the nuclear membrane (*e.g.* H3K27me3, H3K9me2), and participating later in the build up of chromosome axis and loops. The majority of recombination cold spots are in constitutive LADs (the GC-poorest isochores), which are enriched for structural variations, in particular deletions (Jabbari and Nürnberg 2016; Morgan *et al.* 2017), that can locally suppress recombination due to local homologous chromosomes miss-alignments disrupting synapsis (Morgan *et al.* 2017). Interestingly, artificial tethering of DSB sites to the nuclear lamina causes a shift from repair by homologous recombination to repair by non-homologous

273 end-joining (Lemaitre *et al.* 2014). As a consequence, lesions in GC-poor TADs and loops,  
274 characterized by lower recombination, may not depend on homologous recombination for  
275 their repair. In this context TAD loops will be stabilized as in mitotic chromosomes, by the  
276 dynamic binding of cohesin and meiotic insulators. Since BORIS (or CTCF-like), a genomic  
277 neighbour of Spo11 (Jabbari *et al.* 2018), is present in male germ cells during and after  
278 meiosis, it was proposed that it may interact with at least one of the meiosis-specific subunits  
279 of cohesin complexes to contribute to a progressive re-establishment of genome architecture  
280 in haploid post-meiotic round spermatids (Lobanenkov *et al.* 2017).

281         The trade-off between physico-chemical constraints at the DNA level and protein  
282 binding partners is expected to affect the conformation of the chromatin fibre that is believed  
283 to be primarily determined by its own stiffness, which favours or restricts the formation of  
284 long-range contacts (Kleckner 2006). Equally interesting in this regards are the compositional  
285 constraints that shape DNA bendability (Vinogradov 2003, 2017) and super-coiling  
286 (Naughton *et al.* 2013).

287

288 **LD-blocks and chromatin neighbourhoods**

289 The relative concordance between TADs or isochores and recombination or LD-  
290 blocks revealed in this work has two consequences; (1) it suggests that regional variation of  
291 recombination is topologically defined in concert with an underlying compositional and  
292 epigenetic framework. GC-rich domains (isochores) are recombinogenic, which may explain  
293 the small size of GC-rich LD-blocks and TADs sizes (Figure S3). As a result, conserved LD-  
294 blocks, namely those that are shared between Europeans, east Asians and Africans, are  
295 significantly larger in size (Figure S4) and their lower recombination rate is in agreement with  
296 the strong LD blocks being CG-poor (Smith *et al.* 2005) and enriched in cold spots as shown  
297 in figure 1a and b; (2) strong LD between a pair of SNPs in GC-rich recombinogenic TADs  
298 may hint to functional chromatin contacts maintained by purifying selection. The ability of  
299 LD-blocks to encompass long range SNP interactions in regions with enhanced intra-loop  
300 contacts, highlights how allelic chromatin topology analyses can help to infer mechanisms by  
301 which SNPs associate with disease and traits (Tang *et al.* 2015).

302

303 **The Loop organization of the chromatin imposes structural constraints on**  
304 **recombination**

305 It was previously anticipated that meiotic prophase has evolved directly from the latter  
306 stages of the mitotic program (Kleckner 2006). This raises the possibility that when the LADs  
307 disassemble (likely forming larger contact domains) and chromosomes undergo structural  
308 reorganization into linear arrays of chromatin loops, the pre-existing radial loop configuration  
309 keeps its “genomic footprints” on the chromatin loop/axis before the recombination process is  
310 initiated. Because GC-poor TADs/LD-blocks are longer and gene poor (richer in genes with  
311 large introns), one may conclude that the loops emerging from the synaptonemal complex are

312 of different sizes and may be influenced by chromatin packing within loops, leading to  
313 different loop lengths (Zickler and Kleckner 1999).

314 Nucleosome formation generally restricts the accessibility of proteins to DNA,  
315 including Spo11. Meiotic DSBs are reportedly introduced on the chromatin loop regions  
316 that transiently interact with the lateral elements of the synaptonemal complex (Blat *et al.*  
317 2002; Aquaviva *et al.* 2013; Panizza *et al.* 2013), suggesting that these chromatin regions  
318 may contain nucleosome-depleted regions (GC-rich open chromatin) (Getun *et al.* 2010;  
319 Kobayashi *et al.* 2016; Grey *et al.* 2017; Yamada *et al.* 2017). Thus, the local effect is  
320 expected to be stronger in GC-rich TADs, where loops are shorter (Jabbari and Bernardi,  
321 2017), nucleosomes are spaced and PRDM9 and CTCF binding sites are enriched (Grey *et*  
322 *al.* 2017).

323

#### 324 **Evolutionary considerations**

325 As mentioned in the Introduction, whether recombination determines GC level or  
326 whether sequence composition drives recombination is still an open question. Because  
327 CpG methylation is lower and CpG shortage is stronger in amniotes than in amphibia or  
328 fishes (Jabbari *et al.* 1997), some authors speculated (Belle *et al.* 2004) that a GC-bias in  
329 mismatch repair increased in the ancestor of amniotes as a consequence of an increase in  
330 the level of CpG methylation. On the same basis, other authors (Fryxell and Zuckerkandl,  
331 2000) hypothesized that cytosine deamination and DNA base composition affect each  
332 other, generating a positive feedback loop that leads to divergent genetic drifts to high or  
333 low GC%; these authors argued that cytosine deamination must be highly dependent on  
334 body temperature. The body temperature hypothesis was early proposed (see Bernardi  
335 2007) to explain the formation of the more stable GC-rich isochores of mammals and  
336 birds. As far as the correlation between recombination and GC-TADs or isochores is  
337 concerned, the GC homogeneity of fish genomes compared to mammals or birds is



338 compelling, as fish could have evolved the mammalian compositional pattern had their  
339 genome evolved under BGC regimen. Advances in fish and amphibian genetics and  
340 genomics will help to understand which factors could have shaped the biased substitution  
341 patterns leading to the current mammalian and avian GC landscapes. Recombination COs  
342 and BGC frequencies can also be influenced by environmental and physiological  
343 conditions, a well-documented case is the heat-sensitivity of the chromatin axis during  
344 meiosis (Morgan CH. *et al.* 2017; Lloyd *et al.* 2017). This leaves space for an interplay  
345 between selection and recombination in shaping vertebrate genome organization and  
346 nuclear architecture. Conservation of the correlation between recombination rates and  
347 GC% in human and mouse very likely reflects the evolutionary conservation of  
348 mammalian isochores and TADs (Rao *et al.* 2014; Vietri-Rudan 2015 *et al.* 2015; Jabbari  
349 and Bernardi 2017). Therefore, the recombination landscape must be related to the co-  
350 regulation of gene expression or insulated interactions in which chromatin folding (loops  
351 and TADs) plays a critical role.

352

353

## CONCLUSIONS

354 The frequency of cold and hot spots of recombination and its relation to open chromatin  
355 was suspected many decades ago, and largely confirmed later (see introduction and  
356 Morgan *et al.* 2017). The recent observation of the correspondence between isochores and  
357 TADs (Jabbari and Bernardi 2017) and the large number of available genomic maps  
358 allowed us to observe that LD-blocks significantly, albeit weakly, match TADs and  
359 isochores. Cold/hot spots of recombination are compartmentalized, they correspond to  
360 AT/GC rich LADs/TADs. Binding frequencies of key determinants of meiotic  
361 recombination hot spots (PRMD9, Spo11, DMC1, H3K4me3) are positively correlated  
362 with TADs GC%. This implies that recombination frequency is associated with the same  
363 (com)positional features that constrain the distribution of chromatin in the interphase

364 nucleus. We conclude that the chromatin loop domains in leptotene is inherited in part  
365 from the chromatin conformation in interphase. The physical aggregation of cold/hot spots  
366 along chromosomes, expectedly led to the finding of the LD-block/isochores/TADs  
367 concordance. The recombination landscape in mammals is tied to insulated interactions in  
368 which chromatin folding is crucial. Revealing a new aspect of modular recombination  
369 underlying alleles co-segregation may open the way for a better understanding of the  
370 mosaic architecture of genome regulation and evolution.

371

372

373 **References**

374 Acquaviva L, Székvölgyi L, Dichtl B, Dichtl BS, de La Roche Saint André C, Nicolas A,  
375 Géli V. The COMPASS subunit Spp1 links histone methylation to initiation of meiotic  
376 recombination. *Science*. 2013; 339(6116):215-8.

377 Belle EM, Duret L, Galtier N, Eyre-Walker A. The decline of isochores in mammals: an  
378 assessment of the GC content variation along the mammalian phylogeny. *J Mol Evol*. 2004;  
379 58(6):653-60.

380 Bonev B, Mendelson Cohen N, Szabo Q, Fritsch L, Papadopoulos GL, Lubling Y, Xu X,  
381 Lv X, Hugnot JP, Tanay A, Cavalli G. Multiscale 3D Genome Rewiring during Mouse  
382 Neural Development. *Cell*. 2017; 171(3):557-572. e24.

383 Brown TC, Jiricny J. A specific mismatch repair event protects mammalian cells from  
384 loss of 5-methylcytosine. *Cell*. 1987; 50(6):945-50.

385 Brown TC, Jiricny J. Different base/base mispairs are corrected with different efficiencies  
386 and specificities in monkey kidney cells. *Cell*. 1988; 54(5):705-11.

387 1000 Genomes Project Consortium, Auton A, Brooks LD, Durbin RM, Garrison EP,  
388 Kang HM, Korbel JO, Marchini JL, McCarthy S, McVean GA, Abecasis GR. A global  
389 reference for human genetic variation. *Nature*. 2015; 526(7571):68-74.

390 Baudat F, Buard J, Grey C, Fledel-Alon A, Ober C, Przeworski M, Coop G, de Massy B.  
391 PRDM9 is a major determinant of meiotic recombination hotspots in humans and mice.  
392 *Science*. 2010; 327(5967):836-40.

393 Berisa T, Pickrell JK. Approximately independent linkage disequilibrium blocks in  
394 human populations. *Bioinformatics*. 2016; 32(2):283-5.

395 Bernardi G. The isochore organization of the human genome. *Annu Rev Genet*. 1989;  
396 23:637-61. Review.

- 397 Blat Y, Protacio RU, Hunter N, Kleckner N. Physical and functional interactions among  
398 basic chromosome organizational features govern early steps of meiotic chiasma formation.  
399 Cell. 2002; 111(6):791-802
- 400 Brick K, Smagulova F, Khil P, Camerini-Otero RD, Petukhova GV. Genetic  
401 recombination is directed away from functional genomic elements in mice. Nature. 2012;  
402 485(7400):642-5.
- 403 Costantini M, Clay O, Auletta F, Bernardi G. An isochore map of human chromosomes.  
404 Genome Res. 2006; 16(4):536-41.
- 405 Dixon JR, Selvaraj S, Yue F, Kim A, Li Y, Shen Y, Hu M, Liu JS, Ren B. Topological  
406 domains in mammalian genomes identified by analysis of chromatin interactions. Nature.  
407 2012; 485(7398):376-80.
- 408 Durand NC, Robinson JT, Shamim MS, Machol I, Mesirov JP, Lander ES, Aiden EL.  
409 Juicebox Provides a Visualization System for Hi-C Contact Maps with Unlimited Zoom.  
410 Cell Syst. 2016; 3(1):99-101.
- 411 Duret L, Galtier N. Biased gene conversion and the evolution of mammalian genomic  
412 landscapes. Annu Rev Genomics Hum Genet. 2009; 10:285-311.
- 413 Eyre-Walker A. (a) Evidence that both G + C rich and G + C poor isochores are  
414 replicated early and late in the cell cycle. Nucleic Acids Res. 1992; 20(7):1497-501.
- 415 Eyre-Walker A. (b) Recombination and mammalian genome evolution. Proc Biol Sci.  
416 1993; 252(1335):237-43.
- 417 Fryxell KJ, Zuckerkandl E. Cytosine deamination plays a primary role in the evolution of  
418 mammalian isochores. Mol Biol Evol. 2000; 17(9):1371-83.
- 419 Fullerton SM, Bernardo Carvalho A, Clark AG. Local rates of recombination are  
420 positively correlated with GC content in the human genome. Mol Biol Evol. 2001;  
421 18(6):1139-42.

422 Gel B, Díez-Villanueva A, Serra E, Buschbeck M, Peinado MA, Malinverni R. regioneR:  
423 an R/Bioconductor package for the association analysis of genomic regions based on  
424 permutation tests. *Bioinformatics*. 2016; 32(2):289-91.

425 Getun IV, Wu ZK, Khalil AM, Bois PR. Nucleosome occupancy landscape and dynamics  
426 at mouse recombination hotspots. *EMBO Rep*. 2010; 11(7):555-60.

427 Gerber S, Fournier D, Hewel C, Horenko I. Imputation of posterior linkage probability  
428 relations reveals a significant influence of structural 3D constraints on linkage  
429 disequilibrium bioRxiv <https://doi.org/10.1101/255315> [PREPRINT].

430 Gray S, Cohen PE. Control of Meiotic Crossovers: From Double-Strand Break Formation  
431 to Designation. *Annu Rev Genet*. 2016; 50:175-210.

432 Grey C, Barthès P, Chauveau-Le Fric G, Langa F, Baudat F, de Massy B. Mouse  
433 PRDM9 DNA-binding specificity determines sites of histone H3 lysine 4 trimethylation for  
434 initiation of meiotic recombination. *PLoS Biol*. 2011; 9(10):e1001176.

435 Grey C, Clément JA, Buard J, Leblanc B, Gut I, Gut M, Duret L, de Massy B. In vivo  
436 binding of PRDM9 reveals interactions with noncanonical genomic sites. *Genome Res*.  
437 2017; 27(4):580-590.

438 Handel MA, Schimenti JC. Genetics of mammalian meiosis: regulation, dynamics and  
439 impact on fertility. *Nat Rev Genet*. 2010; 11(2):124-36.

440 Hayashi K, Yoshida K, Matsui Y. A histone H3 methyltransferase controls epigenetic  
441 events required for meiotic prophase. *Nature*. 2005 17; 438(7066):374-8.

442 Hecht F. Enigmatic fragile sites on human chromosomes. *Trends Genet*. 1988;  
443 4(5):121-2.

444 Heng HH, Chamberlain JW, Shi XM, Spyropoulos B, Tsui LC, Moens PB. Regulation of  
445 meiotic chromatin loop size by chromosomal position. *Proc Natl Acad Sci U S A*. 1996;  
446 93(7):2795-800.

447 Hill WG, Robertson A. Linkage disequilibrium in finite populations. *Theor Appl Genet.*  
448 1968; 38(6):226-3.

449 Holmquist GP. Chromosome bands, their chromatin flavors, and their functional features.  
450 *Am J Hum Genet.* 1992; 51(1):17-37.

451 Ikemura T, Wada K. Evident diversity of codon usage patterns of human genes with  
452 respect to chromosome banding patterns and chromosome numbers; relation between  
453 nucleotide sequence data and cytogenetic data. *Nucleic Acids Res.* 1991; 19(16):4333-9.

454 Jabbari K, Cacciò S, Païs de Barros JP, Desgrès J, Bernardi G. Evolutionary changes in  
455 CpG and methylation levels in the genome of vertebrates. *Gene.* 1997; 205(1-2):109-18.

456 Jabbari K, Bernardi G. An Isochore Framework Underlies Chromatin Architecture. *PLoS*  
457 *One.* 2017; 12(1):e0168023.

458 Jabbari K, Heger P, Sharma R, Wiehe T. The Diverging routes of BORIS and CTCF: An  
459 interactomic and phylogenomic analysis. *Life.* 2018; 8(1).

460 Jabbari K, Nürnberg P. A genomic view on epilepsy and autism candidate genes.  
461 *Genomics.* 2016; 108(1):31-6.

462 Jung YH, Sauria MEG, Lyu X, Cheema MS, Ausio J, Taylor J, Corces VG. Chromatin  
463 States in Mouse Sperm Correlate with Embryonic and Adult Regulatory Landscapes. *Cell*  
464 *Rep.* 2017; 18(6):1366-1382.

465 Kind J, Pagie L, de Vries SS, Nahidiazar L, Dey SS, et *al.* Genome-wide maps of nuclear  
466 lamina interactions in single human cells. *Cell.* 2015; 163(1):134-47.

467 Kleckner N. Chiasma formation: chromatin/axis interplay and the role(s) of the  
468 synaptonemal complex. *Chromosoma.* 2006; 115(3):175-94

469 Kobayashi W, Takaku M, Machida S, Tachiwana H, Maehara K, Ohkawa Y, Kurumizaka  
470 H. Chromatin architecture may dictate the target site for DMC1, but not for RAD51, during  
471 homologous pairing. *Sci Rep.* 2016; 6:24228.

- 472 Kuhn EM, Therman E. Cytogenetics of Bloom's syndrome. *Cancer Genet Cytogenet.*  
473 1986; 22(1):1-18.
- 474 Lange J, Yamada S, Tischfield SE, Pan J, Kim S, Zhu X, Socci ND, Jasin M, Keeney S.  
475 The Landscape of Mouse Meiotic Double-Strand Break Formation, Processing, and Repair.  
476 *Cell.* 2016; 167(3):695-708. e16.
- 477 Lemaître C, Grabarz A, Tsouroula K, Andronov L, Furst A, Pankotai T, Heyer V, Rogier  
478 M, Attwood KM, Kessler P, Dellaire G, Klaholz B, Reina-San-Martin B, Soutoglou E.  
479 Nuclear position dictates DNA repair pathway choice. *Genes Dev.* 2014; 28(22):2450-63.
- 480 Lemaitre C, Zaghloul L, Sagot MF, Gautier C, Arneodo A, Tannier E, Audit B. Analysis  
481 of fine-scale mammalian evolutionary breakpoints provides new insight into their relation to  
482 genome organisation. *BMC Genomics.* 2009; 10:335.
- 483 Lichten M, de Massy B. The impressionistic landscape of meiotic recombination. *Cell.*  
484 2011; 147(2):267-70.
- 485 Liu H, Huang J, Sun X, Li J, Hu Y, Yu L, Liti G, Tian D, Hurst LD, Yang S. Tetrad  
486 analysis in plants and fungi finds large differences in gene conversion rates but no GC bias.  
487 *Nat Ecol Evol.* 2018; 2(1):164-173.
- 488 Lloyd A, Morgan C, Franklin C, Bomblies K. Plasticity of Meiotic Recombination Rates  
489 in Response to Temperature in *Arabidopsis*. *Genetics.* 2018; *Genetics.* 300588. 2017.
- 490 Lobanenkov VV, Zentner GE. Discovering a binary CTCF code with a little help from  
491 BORIS. *Nucleus.* 2018; 9(1):33-41.
- 492 Marsolier-Kergoat MC, Yeramian E. GC content and recombination: reassessing the  
493 causal effects for the *Saccharomyces cerevisiae* genome. *Genetics.* 2009; 183(1):31-8.
- 494 Meuleman W, Peric-Hupkes D, Kind J, Beaudry JB, Pagie L, Kellis M, Reinders M,  
495 Wessels L, van Steensel B. Constitutive nuclear lamina-genome interactions are highly  
496 conserved and associated with A/T-rich sequence. *Genome Res.* 2013; 23(2):270-80.

497 Morgan AP, Gatti DM, Najarian ML, Keane TM, Galante RJ, Pack AI, Mott R, Churchill  
498 GA, de Villena FP. Structural Variation Shapes the Landscape of Recombination in Mouse.  
499 Genetics. 2017; 206(2):603-619.

500 Morgan CH, Zhang H, Bomblies K. 2017 Are the effects of elevated temperature on  
501 meiotic recombination and thermotolerance linked via the axis and synaptonemal complex?  
502 Phil. Trans. R. Soc. B 372: 20160470.

503 Naughton C, Avlonitis N, Corless S, Prendergast JG, Mati IK, Eijk PP, Cockcroft SL,  
504 Bradley M, Ylstra B, Gilbert N. Transcription forms and remodels supercoiling domains  
505 unfolding large-scale chromatin structures. Nat Struct Mol Biol. 2013; 20(3):387-95.

506 Neale MJ, Keeney S. Clarifying the mechanics of DNA strand exchange in  
507 meiotic recombination. Nature. 2006; 442(7099):153-8.

508 Ono T, Losada A, Hirano M, Myers MP, Neuwald AF, Hirano T. Differential  
509 contributions of condensin I and condensin II to mitotic chromosome architecture in  
510 vertebrate cells. Cell. 2003; 115(1):109-21.

511 Paces J, Zíka R, Paces V, Pavlíček A, Clay O, Bernardi G. Representing GC variation  
512 along eukaryotic chromosomes. Gene. 2004; 333:135-41.

513 Panizza S, Mendoza MA, Berlinger M, Huang L, Nicolas A, Shirahige K, Klein F.  
514 Spo11-accessory proteins link double-strand break sites to the chromosome axis in early  
515 meiotic recombination. Cell. 2011; 146(3):372-83.

516 Pritchard JK, Przeworski M. Linkage disequilibrium in humans: models and data. Am J  
517 Hum Genet. 2001; 69(1):1-14.

518 Rao SS, Huntley MH, Durand NC, Stamenova EK, Bochkov ID, Robinson JT, Sanborn  
519 AL, Machol I, Omer AD, Lander ES, Aiden EL. A 3D map of the human genome at  
520 kilobase resolution reveals principles of chromatin looping. Cell. 2014; 159(7):1665-80.



521 Saccone S, De Sario A, Della Valle G, Bernardi G. The highest gene concentrations in  
522 the human genome are in telomeric bands of metaphase chromosomes. Proc Natl Acad Sci  
523 U S A. 1992; 89(11):4913-7.

524 Smagulova F, Gregoretto IV, Brick K, Khil P, Camerini-Otero RD, Petukhova GV.  
525 Genome-wide analysis reveals novel molecular features of mouse recombination hotspots.  
526 Nature. 2011; 472(7343):375-8.

527 Smith AV, Thomas DJ, Munro HM, Abecasis GR. Sequence features in regions of weak  
528 and strong linkage disequilibrium. Genome Res. 2005; 15(11):1519-34.

529 Sun X, Huang L, Markowitz TE, Blitzblau HG, Chen D, Klein F, Hochwagen A.  
530 Transcription dynamically patterns the meiotic chromosome-axis interface. Elife. 2015; 4.

531 Tang Z, Luo OJ, Li X, Zheng M, Zhu JJ, et al. CTCF-Mediated Human 3D Genome  
532 Architecture Reveals Chromatin Topology for Transcription. Cell. 2015; 163(7):1611-27.

533 Tang WW, Kobayashi T, Irie N, Dietmann S, Surani MA. Specification and epigenetic  
534 programming of the human germ line. Nat Rev Genet. 2016; 17(10):585-600.

535 Tedeschi A, Wutz G, Huet S, Jaritz M, Wuensche A, et al. Wapl is an essential regulator  
536 of chromatin structure and chromosome segregation. Nature. 2013; 501(7468):564-8.

537 Vietri Rudan M, Barrington C, Henderson S, Ernst C, Odom DT, Tanay A, Hadjur S.  
538 Comparative Hi-C reveals that CTCF underlies evolution of chromosomal domain  
539 architecture. Cell Rep. 2015; 10(8):1297-309.

540 Vinogradov AE, Anatskaya OV. DNA helix: the importance of being AT-rich. Mamm  
541 Genome. 2017; 28(9-10):455-464.

542 Vinogradov AE. DNA helix: the importance of being GC-rich. Nucleic Acids Res. 2003;  
543 31(7):1838-44.

544 Wang S, Hassold T, Hunt P, White MA, Zickler D, Kleckner N, Zhang L. Inefficient  
545 Crossover Maturation Underlies Elevated Aneuploidy in Human Female Meiosis. Cell.  
546 2017; 168(6):977-989. e17.

547 Weber CC, Boussau B, Romiguier J, Jarvis ED, Ellegren H. Evidence for GC-biased  
548 gene conversion as a driver of between-lineage differences in avian base composition.  
549 *Genome Biol.* 2014; 15(12):549.

550 Whalen, S Pollard KS. Most regulatory interactions are not in linkage disequilibrium  
551 bioRxiv <https://doi.org/10.1101/272245> [PREPRINT].

552 Yamada S, Kim S, Tischfield SE, Jasin M, Lange J, Keeney S. Genomic and chromatin  
553 features shaping meiotic double-strand break formation and repair in mice. *Cell Cycle.*  
554 2017; 16(20):1870-1884.

555 Zickler D, Kleckner N. Meiotic chromosomes: integrating structure and function. *Annu*  
556 *Rev Genet.* 1999; 33:603-754.

557
